# Supplementary material
Source: ML conference proceedings conference paper supplement (https://openreview.net/forum?id=WLK37mn0El)
Supplement: supplementary_material [file Readme.pdf › supplementary/Readme.pdf]

# DP-Fusion: Token-Level Differentially Private Inference for Large Language Models

This repository contains the codebase for running **DP-Fusion**, a Differentially Private Inference (DPI) framework for document privatization, along with several baselines and attack methods.

The project contains:

- A set of **100 paraphrased documents**
- The proposed **attack and defense methods**
- Code for **mounting privacy attacks** using perplexity and min-k strategies
- **DP-Fusion** defense implementation

## Directory Structure

```
.
├── all_methods_results.json      # Results from various methods
├── input.json                   # Parsed TAB-ECHR dataset with
entities marked
├── candidate_set_100.json       # Candidate entity list per
privacy group
├── Attack.py                   # Script for running attacks
├── DP-FUSION_Defense.py        # Script for running DP-Fusion
defense
├── environment.yml              # Conda environment
specification
├── outputs_qwen_public.json     # Output from public baseline
├── output/                     # Directory for outputs
└── README.pdf                  # You are here :D
```

---

## output/ Directory

This directory contains the output files generated from running both the attack and defense pipelines.

### Attack Outputs

- **test\_attack\_meta\_data.pkl** Contains metadata from the attack, including the log probabilities assigned to tokens for each candidate.

- **test\_attack.json** JSON file containing the results of the attack, including candidate paraphrases and their respective scores from different attack strategies (e.g., min-K, perplexity-based).
- **test\_attack.pkl** A pickle version of test\_attack.json, provided for more efficient loading and analysis.
- **test\_attack.log** Log file capturing the stdout/stderr from the attack script execution.

## Defense Outputs

- **test.json** Resultant file from running the DP-Fusion defense. It contains the redacted\_text field with paraphrased outputs generated via the DP mechanism.
- **test.log** Log file for the defense execution, capturing console output and debug information.

## Installation

To set up the environment, use:

```
conda env create -f environment.yml
conda activate dp-fusion
```

---

## Running the Attack

Use the following command to run the attack pipeline (perplexity and min-k based):

```
python Attack.py \
  --input_file input.json \
  --start 0 \
  --end 100 \
  --gpu "0,1,2,3" \
  --model_id Qwen/Qwen2.5-7B-Instruct \
  --output_file outputs_qwen_public.json \
  --attack_output_file_json output/test_attack.json \
  --attack_output_file_pickle output/test_attack.pkl \
  --attack_output_file_meta_data output/test_attack_meta_data.pkl \
  --to_debug True \
  --number_of_cands 5 \
  --hf_token "hf_xxx" > output/test_attack.log
```

## Attack Script Arguments

| Argument                           | Description                                         |
|------------------------------------|-----------------------------------------------------|
| --input_file                       | Input JSON file with parsed dataset                 |
| --start / --end                    | Document index range to process                     |
| --gpu                              | Comma-separated list of GPU indices                 |
| --model_id                         | HuggingFace model ID                                |
| --output_file                      | The file on which you want to mount the attack      |
| --attack_output_file_json          | JSON output for attack results                      |
| --attack_output_file_pickle        | Pickle file for storing attack results              |
| --<br>attack_output_file_meta_data | Metadata output file                                |
| --to_debug                         | Enable debugging mode (verbose)                     |
| --number_of_cands                  | Number of candidate generations per prompt          |
| --hf_token                         | HuggingFace token (use a private token, not shared) |

## Running the Defense

Use the command below to run the DP-Fusion defense:

```
python DP-FUSION_Defense.py \  
  --input_file input.json \  
  --start 0 \  
  --end 1000000
```

```

--end 100 \
--gpu "0,1,2,3" \
--model_id Qwen/Qwen2.5-7B-Instruct \
--alpha 2.0 \
--output_file output/test.json \
--to_cache True \
--hf_token "hf_xxx" \
--beta_dict '{"PERSON":0.1,"CODE":0.1,"LOC":0.1,"ORG":
0.1,"DEM":0.1,"DATETIME":0.1,"QUANTITY":0.1,"MISC":0.1}'
> output/test.log

```

## Defense Script Arguments

| Argument        | Description                              |
|-----------------|------------------------------------------|
| --input_file    | Input file with parsed dataset           |
| --start / --end | Document index range                     |
| --gpu           | GPUs to use                              |
| --model_id      | Model identifier from HuggingFace        |
| --output_file   | Output file for generated text           |
| --output_dir    | Output directory (default: output/)      |
| --experiment_id | Identifier for the current run           |
| --alpha         | Global DP noise scale                    |
| --beta_dict     | Per-entity DP noise levels               |
| --to_cache      | Cache LLM outputs (uses more GPU memory) |
| --to_debug      | Print debug info                         |

| Argument                   | Description                         |
|----------------------------|-------------------------------------|
| <code>--independent</code> | Use independent group-level privacy |
| <code>--max_tokens</code>  | Max tokens to generate              |
| <code>--hf_token</code>    | HuggingFace token (keep private)    |

---

## Notes

- `candidate_set_100.json`: Union of private entities across documents grouped by privacy types.
  - `outputs_qwen_public.json`: Output from the baseline public generation model, used for attack evaluation.
  - All attack outputs include `.json`, `.pkl`, and metadata for detailed analysis.
-
